# Supplementary material for: Pathways to green entrepreneurial intent: a serial-parallel mediation SEM analysis of educational interventions, Teaching Methods, and personality traits
Source: Research Square preprint supplement (doi:10.21203/rs.3.rs-7823025/v1), 2025-11-24
Supplement: Supplementary file 1 [file 2046a4844c9a87f279c1d66f.docx]

**Tables**

**Table 1. Background information of Respondents (n=1329)**

| Background characteristics | Frequency | Percentage |
| --- | --- | --- |
| Gender |  |  |
| Male | 677 | 50.9 |
| Female | 652 | 49.1 |
| Age |  |  |
| 18 - 25 years | 905 | 68.1 |
| 26 - 35 years | 398 | 29.9 |
| 36 - 45 years | 25 | 1.9 |
| 45 years above | 1 | 0.1 |
| Family entrepreneurial background |  |  |
| Yes | 1045 | 78.6 |
| No | 284 | 21.4 |
| Highest education |  |  |
| Senior High School (SHS) | 168 | 12.7 |
| Higher National Diploma (HND) | 879 | 66.2 |
| Degree | 282 | 21.3 |

Source: Field survey, 2023

**Table 2: Measurement items’ factor loadings and their reliability**

| **Constructs and their respective items** | **Loadings** |
| --- | --- |
| **Entrepreneurial curriculum (Cronbach’s alpha =0.971, CR () =0.975 , CR () =0.972 , AVE =0.832)** |  |
| The entrepreneurship course is developed to meet the needs of the economy | 0.897*** |
| The subject entrepreneurship is interesting because of its interactive learning nature | 0.884*** |
| I gain new experience pursuing the entrepreneurship course | 0.933*** |
| I have acquired entrepreneurial skills through the course | 0.930*** |
| I have gained sound knowledge about business through the entrepreneurship course | 0.934*** |
| Entrepreneurship lessons are real-world situations | 0.925*** |
| The entrepreneurship course adequately cover content to guide dealing with uncertainty | 0.880*** |
| The entrepreneurship course adequately cover content to guide dealing with ambiguity | 0.910*** |
| **University entrepreneurial support (Cronbach’s alpha =0.896 , CR () =0.928 , CR () =0.930 , AVE =0.765)** |  |
| My university offers courses on green entrepreneurship | 0.920*** |
| My university motivates students to start a green business | 0.931*** |
| My university offers project work focused on green entrepreneurship | 0.921*** |
| My university provide students with the financial and policy means to start a new business | 0.707*** |
| **Teaching methods (Cronbach’s alpha = 0.971, CR () =0.975 , CR () =0.971 , AVE =0.831)** |  |
| Lecturers teach the entrepreneurship course to meet real-world needs | 0.914*** |
| Lecturers demonstrate their experiences in teaching entrepreneurship courses | 0.911*** |
| The methodologies used by lecturers to deliver the entrepreneurship courses are very interesting | 0.913*** |
| Lecturers are approachable and have excellent ways of presenting the entrepreneurship courses | 0.910*** |
| Lecturers presents a comprehensive business plan model that prepares me for the real-world of work | 0.936*** |
| Lecturers teaching methodologies stimulate my interest in entrepreneurship course | 0.927*** |
| The stories of great entrepreneurs told during lectures motivates me to develop interest in business ventures | 0.886*** |
| The participatory nature of entrepreneurship lectures makes lessons engaging | 0.896*** |
| **Personal attitude (Cronbach’s alpha =0.936 , CR () =0.948 , CR () =0.950, AVE =0.701)** |  |
| Being a green entrepreneur brings more advantages than disadvantages to me | 0.893*** |
| A career as a green entrepreneur is attractive to me | 0.865*** |
| If I had the opportunity and resources, I would like to become a green entrepreneur | 0.909*** |
| Being a green entrepreneur would entail great satisfaction for me | 0.901*** |
| I support environmental protection measures even if this will cause a loss of jobs | 0.845*** |
| I am concerned about the environmental conditions our children must live under | 0.874*** |
| News reports concerning environmental problems makes me angry | 0.516*** |
| I believe the world is approaching an environmental disaster | 0.825*** |
| **Need for achievement (Cronbach’s alpha =0.961 , CR () =0.969 , CR () =0.962 , AVE =0.838)** |  |
| I am mentally prepared to become an entrepreneur | 0.914*** |
| It is worth working hard to improve past performance | 0.926*** |
| I will excel in fairly difficult task relating to my study and work | 0.922*** |
| I have the acquired leadership skills to be an entrepreneur | 0.909*** |
| I am responsible in finding solutions to my problems | 0.914*** |
| I believe in life, one must aim high and so, take a higher-level risk | 0.910*** |
| **Perceived behaviour control (Cronbach’s alpha =0.966, CR () =0.971 , CR () =0.967 , AVE = 0.767)** |  |
| To start a green business and keep it working would be easy for me. | 0.826*** |
| I am prepared to start a viable green business. | 0.860*** |
| I can control the creation process of a new green business. | 0.885*** |
| I know the necessary practical details to start a green business. | 0.870*** |
| I know how to develop a green entrepreneurial project. | 0.876*** |
| If I tried to start a green business, I would have a high probability of success. | 0.903*** |
| If I start-up a green business, I can succeed in accomplishing my business ideas. | 0.906*** |
| If I start-up a green business, I can achieve most of my business goals. | 0.899*** |
| If I start-up a green business, I can perform effectively on my business missions. | 0.873*** |
| If I start-up a green business, I can effectively overcome environmental problems. | 0.859*** |
| **Risk-taking propensity (Cronbach’s alpha =0.935 , CR () =0.949 , CR () =0.936 , AVE =0.755)** |  |
| I do not care if the profit is small so long as it is assured and constant | 0.864*** |
| I am willing to take high risks for high returns | 0.877*** |
| I do not mind working under conditions of uncertainty if there is a reasonable probability of gains | 0.880*** |
| I do not fear investing my money in a venture whose dividends I have calculated. | 0.884*** |
| I will consider a risk worth taking only if the probability for success is 60 % or more | 0.879*** |
| I fear moving into a new undertaking I know nothing about | 0.826*** |
| **Self-efficacy (Cronbach’s alpha =0.940 , CR () =0.953 , CR () =0.949 , AVE = 0.775)** |  |
| I can tolerate unexpected changes in business conditions. | 0.897*** |
| I can react quickly to take advantage of business opportunities | 0.923*** |
| I can originate new business ideas and products | 0.928*** |
| I can create products that fulfill customers' unmet needs. | 0.924*** |
| I do not have the skills and capabilities required to succeed as a green entrepreneur (reversed coded). | 0.691*** |
| I can develop a well-conceived plan and presentation to potential investors | 0.896*** |
| **Subjective social norms (Cronbach’s alpha =0.911 , CR () =0.934 , CR () =0.930 , AVE = 0.742)** |  |
| If I decided to become a green entrepreneur, my family will support my decision | 0.905*** |
| If I decided to become a green entrepreneur, my friends will support my decision. | 0.904*** |
| If I decided to become a green entrepreneur, my course-mates will support my decision. | 0.919*** |
| If I decided to become a green entrepreneur, I will receive support from the government. | 0.685*** |
| If I decided to become a green entrepreneur, I will receive support from the society. | 0.872*** |
| **Green entrepreneurial intention (Cronbach’s alpha =0.958 , CR () =0.967 , CR () =0.958 , AVE =0.856)** |  |
| Becoming a green entrepreneur is my preferred career choice | 0.917*** |
| My professional goal is to become a green entrepreneur | 0.914*** |
| I am committed to start and run my own green business | 0.943*** |
| I am determined to create a green business in the future | 0.923*** |
| I have been thinking about green business ideas | 0.928*** |

**Table 3 : Effects of Gender and personality traits on Green Entrepreneurship Intention**

| Measuring construct | Est | Std | T-statistics | p-value | Remark |
| --- | --- | --- | --- | --- | --- |
| Gender Green entrepreneurship intention | -0.053 | 0.03 | 1.813 | 0.07 | Trend toward significant |
| Gender x Risk-taking propensity Green entrepreneurship intention | 0.047 | 0.083 | 0.605 | 0.545 | Not significant |
| Gender x Subjective social norm Green entrepreneurship intention | 0.075 | 0.07 | 1.032 | 0.302 | Not significant |
| Gender x Perceived behaviour control Green entrepreneurship intention | -0.003 | 0.089 | 0.013 | 0.99 | Not significant |
| Gender x Personal attitude Green entrepreneurship intention | 0.201 | 0.085 | 2.374 | 0.018 | Significant |
| Gender x Need for achievement Green entrepreneurship intention | -0.101 | 0.098 | 1.071 | 0.284 | Not significant |
| Gender x Self-efficacy Green entrepreneurship intention | -0.224 | 0.091 | 2.462 | 0.014 | Significant |
|  |  |  |  |  |  |

**Table 4: Direct Effects of Entrepreneurship Education Components on Teaching Methods and Personality Traits on Green Entrepreneurial Intention**

| Measuring construct | Est | Stdev | T-statistics | p-values | Remark |
| --- | --- | --- | --- | --- | --- |
| Entrepreneurship curriculum Teaching methods | 0.74 | 0.028 | 26.872 | 0 | Significant |
| University entrepreneurship support Teaching methods | 0.202 | 0.028 | 7.275 | 0 | Significant |
| Teaching methods Need for achievement | 0.862 | 0.011 | 79.608 | 0 | Significant |
| Teaching methods Perceived behaviour control | 0.827 | 0.012 | 68.56 | 0 | Significant |
| Teaching methods Personal attitude | 0.844 | 0.012 | 72.903 | 0 | Significant |
| Teaching methods Risk-taking propensity | 0.818 | 0.013 | 65.193 | 0 | Significant |
| Teaching methods Self-efficacy | 0.832 | 0.012 | 71.467 | 0 | Significant |
| Teaching methods Subjective social norm | 0.784 | 0.015 | 53.805 | 0 | Significant |
| Need for achievement Green entrepreneurship intention | 0.168 | 0.079 | 2.188 | 0.029 | Significant |
| Perceived behaviour control Green entrepreneurship intention | 0.219 | 0.068 | 3.168 | 0.002 | Significant |
| Personal attitude Green entrepreneurship intention | 0.126 | 0.05 | 2.538 | 0.011 | Significant |
| Risk-taking propensity Green entrepreneurship intention | 0.093 | 0.069 | 1.32 | 0.187 | Not significant |
| Self-efficacy Green entrepreneurship intention | 0.298 | 0.077 | 3.869 | 0 | Significant |
| Subjective social norm Green entrepreneurship intention | 0.029 | 0.05 | 0.622 | 0.534 | Not significant |

| Hypothesis | Measuring construct | Est | Stdev | T-statistics | p-values | Remarks |
| --- | --- | --- | --- | --- | --- | --- |
| H1 | Entrepreneurship curriculum Teaching methods Need for achievement | 0.637 | 0.027 | 23.205 | 0 | Supported |
| H2 | Entrepreneurship curriculum Teaching methods Perceived behaviour control | 0.612 | 0.026 | 23.663 | 0 | Supported |
| H3 | Entrepreneurship curriculum Teaching methods Personal attitude | 0.624 | 0.027 | 22.855 | 0 | Supported |
| H4 | Entrepreneurship curriculum Teaching methods Risk-taking propensity | 0.605 | 0.026 | 23.362 | 0 | Supported |
| H5 | Entrepreneurship curriculum Teaching methods Self-efficacy | 0.616 | 0.027 | 22.775 | 0 | Supported |
| H6 | Entrepreneurship curriculum Teaching methods Subjective social norm | 0.58 | 0.025 | 22.834 | 0 | Supported |
| H7 | University entrepreneurship support Teaching methods Need for achievement | 0.175 | 0.024 | 7.391 | 0 | Supported |
| H8 | University entrepreneurship support Teaching methods Perceived behaviour control | 0.168 | 0.023 | 7.293 | 0 | Supported |
| H9 | University entrepreneurship support Teaching methods Personal attitude | 0.171 | 0.023 | 7.414 | 0 | Supported |
| H10 | University entrepreneurship support Teaching methods Risk-taking propensity | 0.166 | 0.023 | 7.304 | 0 | Supported |
| H11 | University entrepreneurship support Teaching methods Self-efficacy | 0.169 | 0.023 | 7.415 | 0 | Supported |
| H12 | University entrepreneurship support Teaching methods Subjective social norm | 0.159 | 0.022 | 7.263 | 0 | Supported |
|  | **Second-order hypotheses** |  |  |  |  |  |
| - | Teaching methods Need for achievement Green entrepreneurship intention | 0.148 | 0.068 | 2.181 | 0.029 | Supported |
| - | Teaching methods Perceived behaviour control Green entrepreneurship intention | 0.179 | 0.057 | 3.14 | 0.002 | Supported |
| - | Teaching methods Personal attitude Green entrepreneurship intention | 0.107 | 0.042 | 2.517 | 0.012 | Supported |
| - | Teaching methods Risk-taking propensity Green entrepreneurship intention | 0.074 | 0.056 | 1.315 | 0.189 | Not supported |
| - | Teaching methods Self-efficacy Green entrepreneurship intention | 0.249 | 0.065 | 3.854 | 0 | Supported |
| - | Teaching methods Subjective social norm Green entrepreneurship intention | 0.024 | 0.039 | 0.62 | 0.535 | Not supported |

**Table 5: Mediation Effects of Teaching Methods and Personality Traits on the Relationship Between Entrepreneurship Education and Green Entrepreneurial Intention**

**Table 6: Serial mediation effects of teaching methods and personality traits on the relationship between entrepreneurship education and green entrepreneurial intention**

| Hypothesis | Measuring construct | Est | Stdev | T-statistics | p-values | Remarks |
| --- | --- | --- | --- | --- | --- | --- |
| H13 | Entrepreneurship curriculum Teaching methods Need for achievement Green entrepreneurship intention | 0.107 | 0.050 | 2.184 | 0.029 | Supported |
| H14 | Entrepreneurship curriculum Teaching methods Perceived behaviour control Green entrepreneurship intention | 0.132 | 0.043 | 3.067 | 0.002 | Supported |
| H15 | Entrepreneurship curriculum Teaching methods Personal attitude Green entrepreneurship intention | 0.079 | 0.031 | 2.505 | 0.012 | Supported |
| H16 | Entrepreneurship curriculum Teaching methods Risk-taking propensity Green entrepreneurship intention | 0.055 | 0.042 | 1.305 | 0.192 | Not supported |
| H17 | Entrepreneurship curriculum Teaching methods Self-efficacy Green entrepreneurship intention | 0.184 | 0.048 | 3.826 | 0 | Supported |
| H18 | Entrepreneurship curriculum Teaching methods Subjective social norm Green entrepreneurship intention | 0.018 | 0.029 | 0.62 | 0.535 | Not supported |
| H19 | University entrepreneurship support Teaching methods Need for achievement Green entrepreneurship intention | 0.030 | 0.015 | 2.039 | 0.041 | Supported |
| H20 | University entrepreneurship support Teaching methods Perceived behaviour control Green entrepreneurship intention | 0.036 | 0.012 | 2.983 | 0.003 | Supported |
| H21 | University entrepreneurship support Teaching methods Personal attitude Green entrepreneurship intention | 0.022 | 0.009 | 2.358 | 0.018 | Supported |
| H22 | University entrepreneurship support Teaching methods Risk-taking propensity Green entrepreneurship intention | 0.015 | 0.012 | 1.304 | 0.192 | Not supported |
| H23 | University entrepreneurship support Teaching methods Self-efficacy Green entrepreneurship intention | 0.05 | 0.015 | 3.366 | 0.001 | Supported |
| H24 | University entrepreneurship support Teaching methods Subjective social norm Green entrepreneurship intention | 0.005 | 0.008 | 0.61 | 0.542 | Not supported |
